# Supplementary material
Source: PubMed Central journal article supplement (PMC3593883)
Supplement: 1218341110_pnas.201218341SI.pdf [file 1218341110_pnas.201218341SI.pdf]

# Supporting Information

## Song and Santos-Sacchi 10.1073/pnas.1218341110

### Equations

Capacitance data were fit to the first derivative of a two-state Boltzmann function

$$C_m = Q_{\max} \frac{ze}{kT} \frac{b}{(1+b)^2} + C_{lin}, \quad b = \exp\left(\frac{-ze(V_m - V_h)}{kT}\right),$$

where  $Q_{\max}$  is the maximum nonlinear charge moved,  $V_h$  is voltage at peak capacitance or equivalently, at half maximum charge transfer,  $V_m$  is membrane potential,  $z$  is valence,  $C_{lin}$  is linear membrane capacitance,  $e$  is electron charge,  $k$  is Boltzmann's constant, and  $T$  is absolute temperature.

Model differential equations are

$$X_o \xrightleftharpoons[k_2]{k_1} X_c \xrightleftharpoons[\beta_0]{\alpha_0} X \xrightleftharpoons[\beta]{\alpha} C$$

$$\frac{dX_o}{dt} = X_c \cdot k_2 - X_o \cdot k_1$$

$$\frac{dX_c}{dt} = X_o \cdot k_1 + X \cdot \beta_0 - X_c \cdot \alpha_0 - X_c \cdot k_2$$

$$\frac{dX}{dt} = X_c \cdot \alpha_0 + C \cdot \beta - X \cdot \alpha - X \cdot \beta_0$$

$$\frac{dC}{dt} = X \cdot \alpha - C \cdot \beta.$$
